# Supplementary material for: The correlation between illness perception, pain intensity and quality of life in elderly with low back pain in Denmark: a cross-sectional study
Source: PeerJ. 2022 Oct 14;10:e14129. doi: 10.7717/peerj.14129 (PMC9575667; doi:10.7717/peerj.14129)
Supplement: Supplemental Information 1 [file peerj-10-14129-s001.xlsx]

## Sheet: Elsinore Cohort 2019 raw data
record_id	sex	lbp_last_year	lbp_last_month	lbp_pain_intensity	lbp_professionals___GP	lbp_professionals___rheumatologist	lbp_professionals___other specialist	lbp_professionals___fysio	lbp_professionals___chiro	lbp_professionals___other	lbp_professionals___dont know	lbp_professionals___none	lbp_back_exercise_b	lbp_p_killers_year	lbp_p_killers_day	lbp_p_killers_day_b___1	lbp_p_killers_day_b___2	lbp_p_killers_day_b___3	lbp_p_killers_day_b___4	lbp_p_killers_day_b___5	lbp_p_killers_day_b___6	lbp_p_killers_day_b___7	lbp_p_killers_day_b___8	lbp_p_killers_day_b___9	lbp_psycological	lbp_sexual	health	EQ5D_VAS	social_status___2	social_status___3	social_status___4	social_status___5	education	ipq_1	Corrected_IPQ_2_	ipq_3	ipq_4	ipq_5	ipq_6	ipq_7	ipq_8	BMI	EQ5D_Index	regular_LBPexercise	WARD_2Clustre	K_means2centroids	WARD3_clustre	K_means3centroids	Amount_non_pharma
4	0	3	3	1	0	0	0	0	1	0	0	0	2	0		0	0	0	0	0	0	0	0	0	3	3	2	80	0	0	1	0	1	3	10	7	10	5	3	7	4	26.493	0.824	1	1	1	2	2	2
10	0	5	3	3	0	1	0	1	0	0	0	0	2	1	1	1	0	0	1	0	0	0	0	0	4	4	5	10	0	0	0	0	5	10	10	1	3	10	10	8	9	34.7222	0.162	1	1	1	1	1	2
12	0	5	3	4	1	1	0	0	1	0	0	0	4	1	1	1	0	1	0	0	0	1	0	0	3	2	2	75	0	0	0	0	4	5	10	8	5	8	6	8	5	33.8021	0.824	0	1	1	1	1	1
21	0	5	3	4	0	1	0	1	1	0	0	0	1	1	1	1	0	1	0	0	0	0	0	0	3	4	3	60	0	0	0	1	1	5	10	6	4	5	5	5	1	30.8463	0.776	1	1	1	1	1	3
22	0	3	1	1	0	0	0	0	1	0	0	0	3	0		0	0	0	0	0	0	0	0	0	3	3	2	84	0	0	0	0	3	3	10	7	10	3	1	10	1	24.4646	0.824	0	1	1	2	2	1
25	0	5	3	4	0	0	0	0	0	0	0	1	2	1	2	0	0	0	0	0	0	0	0	0	3	2	3	25	0	0	0	0	4	8	10	1	1	8	10	5	5	25.3069	0.442	1	1	1	1	1	1
26	0	4	2	1	0	0	0	0	0	0	0	1	2	0		0	0	0	0	0	0	0	0	0	3	3	1	95	0	0	0	0	6	2	10	9	7	3	2	8	2	23.8895	1	1	1	1	2	2	1
27	0	3	3	3	0	0	0	0	0	0	0	1		0		0	0	0	0	0	0	0	0	0	3	2	3	48	0	0	0	1	6	8	10	7	1	6	6	6	3	24.7843	0.723	0	1	1	1	1	0
29	0	5	3	1	0	0	0	0	0	0	0	1	2	1	2	0	0	0	0	0	0	0	0	0	3	3	3	80	0	0	0	0	3	5	10	4	1	5	5	4	5	23.7118	0.824	1	1	1	1	1	1
31	0	4	2	1	0	0	0	0	1	0	0	0	1	1	2	0	0	0	0	0	0	0	0	0	3	3	2	70	0	0	0	0	5	3	10	6	5	5	3	9	2	27.8852	0.824	1	1	1	1	2	2
32	0	3	4	2	0	0	0	0	1	0	0	0	2	1	2	0	0	0	0	0	0	0	0	0	3	3	2	83	0	0	0	0	3	4	7	7	8	4	1	7	7	22.151	1	1	1	1	1	2	2
33	0	4	2	1	0	0	0	0	0	0	0	1	2	1	1	1	0	1	0	0	0	0	0	0	3	3	3	57	0	0	0	0	1	5	10	8	1	5	3	10	1	29.0253	0.824	1	1	1	2	2	1
36	0	5	3	4	0	0	0	0	0	1	0	0	2	1	2	0	0	0	0	0	0	0	0	0	3	3	2	55	0	0	0	0	5	5	8	7	8	3	3	8	3	19.0451	0.824	1	1	1	1	2	1
38	0	5	1	4	1	0	0	1	0	0	0	0	2	1	2	0	0	0	0	0	0	0	0	0	3	3	1	93	0	0	0	0	1	4	10	8	10	4	2	10	3	19.5312	0.756	1	1	1	2	2	2
40	0	4	2	1	1	0	0	1	0	0	0	0	2	0		0	0	0	0	0	0	0	0	0	4	3	2	70	0	0	0	0	1	3	8	7	6	3	4	7	3	30.4218	0.456	1	1	1	1	2	2
43	0	3	4	1	0	0	0	0	0	0	0	1		0		0	0	0	0	0	0	0	0	0	3	2	3	70	0	0	0	0	3	3	10	5	2	5	5	10	5	31.7418	0.592	0	1	1	1	2	0
44	0	5	3	4	1	0	0	1	0	0	0	0	2	1	1	1	0	0	0	0	0	0	0	0	3	3	3	80	0	0	0	0	6	7	10	8	8	8	6	7	5	24.3375	0.756	1	1	1	1	1	2
47	0	5	1	3	1	1	0	1	1	0	0	0	1	1	1	1	0	1	0	0	0	0	0	0	3	3	3	47	0	0	0	0	1	10	10	1	1	7	10	1	5	30.4878	0.723	1	1	1	1	1	3
48	0	5	3	2	1	0	0	1	0	0	0	0	2	0		0	0	0	0	0	0	0	0	0	4	1	2	89	0	0	0	0	5	7	10	7	10	7	7	7	10	23.0518	0.824	1	1	1	1	1	2
49	0	5	3	2	0	0	0	1	0	0	0	0	2	0		0	0	0	0	0	0	0	0	0	4	4	3	70	0	0	1	1	6	7	9	2	8	6	8	3	6	26.1719	0.655	1	1	1	1	1	2
50	0	5	3	4	1	0	0	0	0	0	0	0	2	0		0	0	0	0	0	0	0	0	0	3	2	3	23	0	0	0	0	1	5	10	5	5	5	5	5	5	25.7093	0.723	1	1	1	1	1	1
61	0	4	1	2	0	0	0	0	0	0	0	1	2	0		0	0	0	0	0	0	0	0	0	3	3	2	78	0	0	0	0	4	4	10	6	5	5	3	3	1	24.3824	0.824	1	1	1	2	2	1
62	0	4	3	4	1	1	0	0	0	0	0	0	1	1	2	0	0	0	0	0	0	0	0	0	3	3	1	85	0	0	0	0	5	4	10	4	4	5	3	8	3	32.2979	0.776	1	1	1	1	2	1
64	0	5	3	4	0	0	0	0	0	0	0	1	4	0		0	0	0	0	0	0	0	0	0	3	1	3	60	0	0	0	0	1	7	10	8	2	6	6	9	7	31.0979	0.776	0	1	1	1	1	0
66	0	4	1	4	0	0	0	0	0	0	0	1	4	0		0	0	0	0	0	0	0	0	0	3	4	3	75	0	0	1	1	3	3	6	3	3	5	2	10	1	29.0437	0.627	0	2	1	3	2	0
67	0	5	3	4	0	0	0	0	1	0	0	0	2	1	2	0	0	0	0	0	0	0	0	0	3	3	2	80	0	0	0	0	6	7	10	7	1	6	4	5	3	19.7133	0.824	1	1	1	1	1	2
70	0	5	2	4	0	0	0	1	0	0	0	0	1	1	1	1	0	1	0	0	0	1	0	0	3	3	2	91	0	0	0	0	1	2	10	9	8	3	3	9	1	29.0318	0.824	1	1	1	2	2	2
71	0	2	1	2	0	0	0	1	0	0	0	0	2	0		0	0	0	0	0	0	0	0	0	3	3	3	87	0	0	0	0	1	4	10	8	10	4	4	7	2	24.0055	1	1	1	1	2	2	2
72	0	2	4	1	0	0	1	0	0	0	0	0	3	0		0	0	0	0	0	0	0	0	0	3	3	2	90	0	0	0	0	4	3	8	9	10	3	3	10	1	23.7954	1	0	1	1	2	2	0
74	0	4	2	2	0	0	0	0	0	0	0	1	3	0		0	0	0	0	0	0	0	0	0	3	3	3	60	0	0	0	0	1	1	10	5	4	1	1	5	1	27.1816	0.824	0	1	1	2	2	0
77	0	4	2	4	0	0	0	0	0	0	0	1	3	0		0	0	0	0	0	0	0	0	0	3	3	4	31	0	0	1	0	1	6	10	7	5	5	5	9	2	27.2173	0.776	0	1	1	1	2	0
81	0	3	2	2	0	0	0	0	0	0	0	1	4	1	2	0	0	0	0	0	0	0	0	0	3	2	3	77	1	0	0	1	5	3	10	5	10	5	3	8	5	24.3824	0.824	0	1	1	2	2	0
86	0	2	1	1	0	0	0	0	0	0	0	1	3	1	2	0	0	0	0	0	0	0	0	0	3	3	2	53	0	1	0	0	5	8	8	9	3	7	3	10	5	53.3983	0.723	0	1	1	1	2	0
90	0	2	1	1	0	0	0	0	0	0	0	1		0		0	0	0	0	0	0	0	0	0	3	4	2	10	0	0	0	0	1	3	10	5	5	5	1	9	2	23.0518	0.824	0	1	1	1	2	0
91	0	3	2	1	0	0	0	0	0	1	0	0	3	0		0	0	0	0	0	0	0	0	0	3	3	2	85	0	1	0	0	3	2	10	8	5	4	2	10	2	26.1224	1	0	1	1	2	2	0
94	0	4	3	4	0	0	0	0	0	0	0	1	1	1	1	1	0	1	0	0	0	0	0	0	3	2	4	25	0	0	0	0	1	8	10	3	2	8	10	4	10	24.1115	0.655	1	1	1	1	1	1
97	0	2	4	1	0	0	1	0	0	0	0	0	2	0		0	0	0	0	0	0	0	0	0	3	3	2	91	0	0	0	0	5	2	10	10	3	3	1	10	1	25.9107	1	1	1	1	2	2	1
101	0	3	1	1	0	0	0	1	0	0	0	0	2	1	2	0	0	0	0	0	0	0	0	0	3	3	1	95	0	0	1	0	5	2	10	10	10	2	1	10	2	22.7244	0.824	1	1	1	2	2	2
111	0	4	3	4	0	0	0	1	0	0	0	0	1	0		0	0	0	0	0	0	0	0	0	4	3	3	74	0	1	0	1	4	5	10	3	10	8	8	6	7	21.2585	0.708	1	1	1	1	1	2
112	0	4	1	2	0	0	0	0	1	0	0	0		1	2	0	0	0	0	0	0	0	0	0	4	3	3	68	0	0	0	0	3	3	10	5	8	5	5	5	5	27.6888	0.776	0	1	1	1	1	1
119	0	3	1	1	0	0	0	0	1	0	0	0		1	2	0	0	0	0	0	0	0	0	0	3	3	2	80	0	0	0	0	3	3	10	8	9	3	2	9	1	23.03	0.776	0	1	1	2	2	1
122	0	5	2	1	0	0	0	0	0	1	0	0		0		0	0	0	0	0	0	0	0	0	3	3	2	80	0	0	0	0	5	2	10	8	5	3	4	10	2	24.3911	0.756	0	1	1	2	2	0
125	0	2	4	1	0	0	0	0	0	0	0	1		0		0	0	0	0	0	0	0	0	0	3	3	2	86	0	0	0	0	5	2	6	5	5	3	3	8	2		1	0	2	1	3	2	0
128	0	4	3	2	1	0	0	1	0	0	0	0	2	1	2	0	0	0	0	0	0	0	0	0	3	3	2	70	0	0	0	0	1	3	10	7	8	6	5	8	1	21.7993	0.776	1	1	1	2	2	2
136	0	4	1	2	0	0	0	0	0	0	0	1	2	0		0	0	0	0	0	0	0	0	0	3	4	3	100	0	1	0	0	1	5	10	1	10	5	1	1	1	24.5243	1	1	1	1	2	1	1
138	0	3	2	1	0	0	0	0	0	0	0	1	1	0		0	0	0	0	0	0	0	0	0	3	3	1	98	0	0	0	1	6	2	10	9	1	2	1	10	1	17.1468	1	1	1	1	2	2	1
149	0	3	1	2	0	0	0	0	0	0	0	1		0		0	0	0	0	0	0	0	0	0	3	3	1	50	0	0	0	0	3	3	8	4	4	4	4	4	1	33.6901	0.824	0	1	1	2	2	0
151	0	4	3	1	0	0	0	1	0	0	0	0	3	1	2	0	0	0	0	0	0	0	0	0	3	3	2	79	0	0	0	0	1	6	10	9	8	7	6	8	3	23.8754	1	0	1	1	1	1	1
156	0	4	4	4	0	0	0	0	0	0	0	1	2	1	2	0	0	0	0	0	0	0	0	0	2	4	4	26	0	0	0	1	1	4	10	5	4	4	3	4	3	28.7105	0.655	1	1	1	2	2	1
157	0	2	1	4	0	0	0	1	0	0	0	0	3	0		0	0	0	0	0	0	0	0	0	3	3	2	62	0	0	0	0	5	2	10	2	7	6	5	7	5	31.1419	1	0	1	1	1	1	1
158	0	5	3	2	1	0	0	0	1	0	0	0	3	1	2	0	0	0	0	0	0	0	0	0	4	4	2	75	0	0	0	0	1	5	6	5	6	5	5	6	5	32.872	0.708	0	1	1	1	1	1
162	0	2	4	1	0	0	0	0	0	0	0	1	4	0		0	0	0	0	0	0	0	0	0	3	3	4	62	0	0	0	0	1	1	10	10	1	5	1	10	1	23.0469	0.723	0	1	1	2	2	0
183	0	2	4	1	0	0	0	0	0	0	0	1	3	0		0	0	0	0	0	0	0	0	0	3	3	1	93	0	0	0	0	5	1	8	6	2	3	1	10	1	24.093	1	0	1	1	2	2	0
189	0	5	2	3	1	0	0	0	0	0	0	0	1	1	1	1	0	1	1	0	0	0	0	0	2	4	4	63	1	0	0	0	5	9	8	2	6	7	10	3	6	30.8248	0.655	1	1	1	1	1	1
192	0	3	1	2	0	0	0	0	0	0	0	1	1	0		0	0	0	0	0	0	0	0	0	3	2	2	85	0	0	0	0	5	3	10	7	4	3	2	7	2	29.3724	1	1	1	1	2	2	1
194	0	4	1	1	0	0	0	0	0	0	0	1		0		0	0	0	0	0	0	0	0	0	4	3	3	42	0	0	0	0	1	4	9	4	5	4	4	4	2	27.4348	0.703	0	1	1	2	1	0
195	0	5	2	4	0	0	0	1	0	0	0	0	2	1	1	1	0	0	0	0	1	0	0	0	4	2	3	52	0	0	1	1	3	5	10	6	5	5	4	7	3	28.3987	0.655	1	1	1	1	2	2
210	0	3	1	1	0	0	0	0	0	0	0	1	2	0		0	0	0	0	0	0	0	0	0	3	3	2	80	0	0	1	0	1	2	8	8	8	2	2	9	1	23.833	0.824	1	1	1	2	2	1
211	0	4	2	4	0	0	0	0	0	0	0	1		0		0	0	0	0	0	0	0	0	0	3	4	3	70	0	0	0	0	6	6	10	7	5	7	3	10	1	27.31	0.723	0	1	1	1	2	0
221	0	4	3	1	0	0	0	0	0	0	0	1	1	1	2	0	0	0	0	0	0	0	0	0	3	3	3	37	0	0	0	0	5	4	10	8	3	7	3	3	2	24.8016	0.824	1	1	1	2	2	1
222	0	4	2	4	0	0	0	0	0	0	0	1	3	0		0	0	0	0	0	0	0	0	0	3	3	3	70	0	0	1	0	5	4	10	3	7	6	5	5	3	28.6726	0.824	0	1	1	1	1	0
226	0	5	3	2	0	0	0	0	0	0	0	1	3	0		0	0	0	0	0	0	0	0	0	3	4	2	67	0	0	0	0	5	4	10	5	5	5	5	3	2	23.03	0.824	0	1	1	2	1	0
230	0	2	4	1	0	0	0	0	0	0	0	1		0		0	0	0	0	0	0	0	0	0	3	3	2	50	0	0	0	0	1	5	6	5	4	3	2	8	3	23.4221	0.756	0	2	1	3	2	0
240	0	3	1	4	0	0	0	1	0	0	0	0	2	1	2	0	0	0	0	0	0	0	0	0	3	3	1	91	0	0	1	1	4	3	10	8	1	3	3	10	3	24.0055	0.776	1	1	1	2	2	2
241	0	5	2	4	0	0	0	1	0	0	0	0	1	1	1	1	0	0	0	0	0	0	0	0	3	4	2	73	0	0	1	0	3	5	10	7	1	5	1	10	7	25.0995	0.824	1	1	1	1	2	2
244	0	3	1	2	0	0	0	0	0	0	0	1		0		0	0	0	0	0	0	0	0	0	3	3	3	82	0	1	0	0	5	4	10	1	7	7	10	1	10	28.9062	1	0	1	1	1	1	0
252	0	5	3	4	1	0	0	1	0	0	0	0		1	2	0	0	0	0	0	0	0	0	0	2	2	2	30	0	1	1	0	4	8	7	3	7	8	10	8	8	27.5134	0.655	0	1	1	1	1	1
254	0	4	3	2	1	0	0	0	0	0	0	0		0		0	0	0	0	0	0	0	0	0	3	3	3	79	1	0	0	0	4	6	9	1	10	6	10	8	7	28.306	0.723	0	1	1	1	1	0
256	0	4	2	1	0	0	0	0	1	0	0	0	2	0		0	0	0	0	0	0	0	0	0	3	3	2	75	0	0	0	0	2	5	10	5	5	5	3	9	2	21.2585	0.824	1	1	1	1	2	2
257	0	5	3	4	1	0	0	1	0	0	0	0	2	1	1	1	0	0	1	0	0	0	0	0	1	1	3	58	0	0	0	0	5	9	10	8	7	5	7	6	6	23.03	0.559	1	1	1	1	1	2
258	1	4	3	1	0	0	0	0	0	0	0	1		0		0	0	0	0	0	0	0	0	0	3	3	2	80	0	0	0	0	3	4	10	8	1	5	1	5	1	24.2215	0.824	0	1	1	2	2	0
260	1	2	1	2	0	0	0	0	1	0	0	0	4	0		0	0	0	0	0	0	0	0	0	4	3	3	83	0	0	0	0	3	3	10	9	9	3	2	9	1	28.089	0.818	0	1	1	2	2	1
263	1	4	3	4	0	0	0	0	1	0	0	0		0		0	0	0	0	0	0	0	0	0	3	3	2	81	0	0	0	0	6	6	10	5	7	5	3	2	2	28.4831	0.824	0	1	1	2	1	1
268	1	3	3	1	0	0	0	1	0	0	0	0	2	0		0	0	0	0	0	0	0	0	0	3	4	1	87	0	0	0	0	5	2	9	9	3	4	2	5	1	23.1481	1	1	1	1	2	2	2
270	1	2	4	1	0	0	0	0	0	0	0	1	2	0		0	0	0	0	0	0	0	0	0	3	3	3	87	1	0	0	1	5	2	9	7	5	3	6	4	6	133.31	1	1	1	1	1	1	1
274	1	2	1	4	0	0	0	0	0	0	0	1	1	0		0	0	0	0	0	0	0	0	0	3	3	1	74	0	0	0	0	1	3	10	8	5	5	5	5	4	129.553	1	1	1	1	1	1	1
285	1	4	2	4	0	0	0	0	1	0	0	0	4	1	2	0	0	0	0	0	0	0	0	0	3	3	3	75	0	0	0	0	1	5	10	3	3	5	5	5	4	26.1224	0.776	0	1	1	1	1	1
288	1	3	2	1	0	1	0	0	0	0	0	0	1	1	2	0	0	0	0	0	0	0	0	0	3	3	2	76	0	0	1	0	6	4	10	6	5	6	4	8	1	24.3375	0.824	1	1	1	1	2	1
289	1	2	4	1	0	0	0	0	0	0	0	1	2	0		0	0	0	0	0	0	0	0	0	3	3	3	70	0	0	0	0	5	2	10	7	10	2	3	8	1	27.4717	1	1	1	1	2	2	1
294	1	5	3	2	0	0	0	0	0	0	0	1	3	0		0	0	0	0	0	0	0	0	0	3	4	2	80	0	0	0	0	3	5	8	5	8	4	2	5	2	27.7744	0.824	0	1	1	2	2	0
306	1	2	2	1	0	0	0	0	0	0	0	1		0		0	0	0	0	0	0	0	0	0	3	3	3	43	0	0	0	0	6	2	10	1	1	1	1	10	1	25.1063	1	0	1	1	2	2	0
313	1	2	1	4	0	0	0	0	1	0	0	0	2	1	2	0	0	0	0	0	0	0	0	0	4	4	3	50	0	0	0	0	1	7	7	7	5	7	3	5	2	39.1837	0.708	1	1	1	1	1	2
319	1	2	2	1	0	0	0	0	1	0	0	0		0		0	0	0	0	0	0	0	0	0	3	3	1	95	0	0	0	0	4	2	9	9	10	4	2	10	2	25.3515	0.824	0	1	1	2	2	1
325	1	3	1	2	0	0	0	0	0	0	0	1		0		0	0	0	0	0	0	0	0	0	4	3	3	66	0	0	0	0	1	2	10	9	2	1	1	4	2	28.7317	0.818	0	1	1	2	2	0
334	1	2	1	2	0	0	0	0	0	0	0	1		1	2	0	0	0	0	0	0	0	0	0	3	3	2	75	0	0	0	0	3	3	5	4	4	3	3	5	3	26.2649	0.824	0	2	1	3	2	0
340	1	3	3	3	0	0	0	0	0	0	0	1	2	1	1	1	0	1	0	0	0	0	0	0	3	4	2	70	0	0	0	0	1	6	6	3	8	8	5	3	7	28.6508	0.776	1	1	1	1	1	1
347	1	3	1	2	0	0	0	1	0	0	0	0	3	0		0	0	0	0	0	0	0	0	0	4	3	2	80	0	0	0	0	3	5	10	5	8	5	8	5	8	26.595	0.824	0	1	1	1	1	1
352	1	2	4	1	0	0	0	0	0	0	0	1	2	0		0	0	0	0	0	0	0	0	0	3	3	3	81	0	0	0	0	5	2	9	2	10	2	2	10	1	25.6173	1	1	1	1	2	2	1
353	1	2	2	4	0	0	0	0	0	0	0	1	3	1	1	1	0	1	0	1	0	0	0	0	3	3	2	85	1	0	0	0	3	6	10	8	5	7	5	5	2	34.6861	0.824	0	1	1	1	1	0
356	1	4	1	2	0	0	0	1	0	0	0	0	2	1	2	0	0	0	0	0	0	0	0	0	3	3	3	75	0	0	0	0	6	4	8	5	8	5	5	9	5	23.8884	0.776	1	1	1	2	1	2
359	1	2	4	2	0	0	0	0	0	0	0	1	3	0		0	0	0	0	0	0	0	0	0	3	3	2	80	0	0	0	0	3	3	10	7	8	5	4	8	2	25.5922	1	0	1	1	2	2	0
360	1	3	2	2	0	0	0	0	0	0	0	1		0		0	0	0	0	0	0	0	0	0	3	3	2	81	0	0	0	0	3	3	8	4	6	4	3	8	3	27.143	0.824	0	2	1	3	2	0
367	1	2	2	2	0	0	0	0	0	0	0	1	3	0		0	0	0	0	0	0	0	0	0	3	3	1	90	0	0	0	0	6	3	9	3	5	3	3	5	2	29.8606	0.824	0	1	1	2	2	0
371	1	4	2	4	0	0	0	1	0	0	0	0	2	0		0	0	0	0	0	0	0	0	0	3	3	3	70	0	0	0	0	1	5	10	5	7	1	7	5	5	30.2992	0.824	1	1	1	1	1	2
374	1	5	3	4	0	0	0	0	0	0	0	1	3	1	1	1	0	0	0	0	0	0	0	0	3	2	3	50	0	0	0	0	2	7	10	5	8	7	8	8	8	33.241	0.655	0	1	1	1	1	0
376	1	2	1	2	0	0	0	0	0	0	0	1	3	0		0	0	0	0	0	0	0	0	0	3	3	2	80	0	0	0	0	3	1	10	5	5	1	2	2	1	17.5926	0.824	0	1	1	2	2	0
380	1	5	1	4	0	0	0	0	0	0	0	1		0		0	0	0	0	0	0	0	0	0	3	3	2	73	0	0	0	0	6	3	8	4	4	3	2	4	2	30.9617	0.824	0	1	1	2	2	0
387	1	2	1	1	0	0	0	0	0	0	0	1	3	0		0	0	0	0	0	0	0	0	0	3	3	2	80	0	0	0	0	5	2	10	2	2	3	1	8	1	41.0302	1	0	1	1	2	2	0
389	1	2	1	4	1	0	0	0	0	0	0	0	2	1	2	0	0	0	0	0	0	0	0	0	3	3	2	70	0	0	0	0	1	7	10	6	6	6	6	6	6	27.143	0.49	1	1	1	1	1	1
404	1	4	2	1	0	0	0	0	0	0	0	1	3	0		0	0	0	0	0	0	0	0	0	3	3	2	80	0	0	0	0	1	2	8	7	2	3	2	7	1	25.2493	1	0	1	1	2	2	0
405	1	5	3	2	0	0	0	0	0	0	0	1	3	1	2	0	0	0	0	0	0	0	0	0	3	2	4	40	0	0	0	0	1	4	10	4	5	5	5	8	7	33.0813	0.645	0	1	1	1	1	0
406	1	2	1	2	0	0	0	0	0	0	0	1		0		0	0	0	0	0	0	0	0	0	2	4	3	27	1	0	0	0	5	4	8	7	7	3	5	6	5	28.3848	0.655	0	1	1	1	1	0
407	1	5	3	4	0	0	1	0	0	0	0	0	2	1	1	1	0	1	0	0	0	0	0	0	2	2	2	50	0	1	0	0	5	6	10	5	6	6	8	8	8	29.7458	0.655	1	1	1	1	1	1
410	1	3	3	2	0	0	0	0	1	0	0	0		0		0	0	0	0	0	0	0	0	0	2	2	3	66	0	0	0	1	3	4	6	5	5	5	7	3	8	23.5102	0.708	0	1	1	1	1	1
411	1	3	2	1	0	0	0	0	0	0	0	1	2	0		0	0	0	0	0	0	0	0	0	3	3	2	85	0	0	0	0	5	2	8	6	10	3	1	8	2	22.4766	0.776	1	2	1	3	2	1
412	1	2	2	2	0	0	0	0	0	0	0	1		0		0	0	0	0	0	0	0	0	0	3	3	3	64	0	0	0	0	3	4	6	5	7	3	3	6	7	27.0641	0.824	0	1	1	1	1	0
413	1	4	1	1	0	0	0	0	1	0	0	0		0		0	0	0	0	0	0	0	0	0	3	3	2	90	0	0	0	0	1	2	8	8	6	4	1	9	1	27.7575	1	0	1	1	2	2	1
424	1	3	2	2	0	0	0	0	0	0	0	1		1	2	0	0	0	0	0	0	0	0	0	3	3	2	85	0	0	0	0	5	2	10	7	1	2	4	8	2	27.7778	1	0	1	1	2	2	0
429	1	3	2	4	0	0	0	0	0	0	0	1	4	0		0	0	0	0	0	0	0	0	0	3	3	2	77	0	0	0	0	3	3	10	7	8	3	3	8	2	27.0416	0.824	0	1	1	2	2	0
434	1	4	1	1	0	0	0	0	0	0	0	1		0		0	0	0	0	0	0	0	0	0	3	3	2	70	0	0	0	0	1	3	8	7	1	4	1	10	1	21.2585	1	0	1	1	2	2	0
435	1	4	2	1	0	0	0	0	0	0	0	1	3	0		0	0	0	0	0	0	0	0	0	3	3	3	50	0	0	0	0	3	7	10	3	8	5	7	8	6	24.4898	0.824	0	1	1	1	1	0
449	1	3	1	1	0	0	0	0	0	0	0	1		0		0	0	0	0	0	0	0	0	0	3	3	2	52	0	0	0	0	1	3	10	1	1	2	2	2	2	31.0979	0.776	0	1	1	2	2	0
450	1	3	4	1	0	0	0	0	0	0	0	1		1	2	0	0	0	0	0	0	0	0	0	3	3	1	90	0	0	0	0	1	3	10	8	5	3	2	10	2	24.0569	1	0	1	1	2	2	0
465	1	3	1	3	0	0	0	0	1	0	0	0		0		0	0	0	0	0	0	0	0	0	3	3	2	91	0	0	0	0	5	3	6	7	8	8	6	9	3	28.6801	0.824	0	1	1	1	1	1
467	1	4	2	2	0	0	0	1	0	0	0	0	2	0		0	0	0	0	0	0	0	0	0	3	3	2	80	0	0	0	0	5	6	5	1	8	6	8	9	5	24.0997	0.776	1	1	1	1	1	2
469	1	5	2	3	0	0	0	0	0	0	0	1	3	1	2	0	0	0	0	0	0	0	0	0	3	3	3	29	0	0	0	0	3	7	10	3	4	5	2	1	1	24.5351	0.776	0	1	1	2	1	0
470	1	2	1	1	0	0	0	0	0	0	0	1		0		0	0	0	0	0	0	0	0	0	3	3	1	90	0	0	0	0	4	1	10	9	5	5	1	5	1	27.1809	0.818	0	1	1	2	2	0
482	1	2	1	2	0	0	0	0	0	0	0	1	2	1	2	0	0	0	0	0	0	0	0	0	3	3	2	73	0	0	0	0	1	3	8	7	2	3	2	9	1	37.2428	1	1	1	1	2	2	1
491	1	2	4	2	0	0	0	0	0	0	0	1		0		0	0	0	0	0	0	0	0	0	3	3	3	60	0	0	0	0	3	2	10	3	6	3	2	5	2	30.5568	0.818	0	1	1	2	2	0
492	1	2	2	3	0	0	0	0	0	0	0	1	4	0		0	0	0	0	0	0	0	0	0	3	2	5	90	0	0	0	0	1	5	10	5	3	9	5	8	3	25.1063	0.427	0	1	1	1	1	0
493	0	2	4	4	0	0	0	0	0	0	0	1	3	0		0	0	0	0	0	0	0	0	0	4	3	2	50	0	0	1	0	3	3	10	3	3	3	1	10	1	20.8209	0.824	0	1	1	2	2	0
496	1	2	4	1	0	0	0	1	0	0	0	0	4	0		0	0	0	0	0	0	0	0	0	3	3	2	80	0	0	0	0	5	3	10	8	10	3	3	8	2	23.9912	1	0	1	1	2	2	1
497	1	4	3	1	0	0	0	1	0	0	0	0	1	0		0	0	0	0	0	0	0	0	0	3	3	4	50	1	1	0	1	1	7	9	7	8	7	7	7	2	24.6181	0.66	1	1	1	1	1	2
505	0	5	3	4	1	0	0	0	0	0	0	0		0		0	0	0	0	0	0	0	0	0	3	4	3	58	0	0	1	0	3	4	7	2	6	2	7	2	5	25.0995	0.824	0	1	1	1	1	0
509	1	2	1	4	0	0	0	0	0	0	0	1	3	0		0	0	0	0	0	0	0	0	0	3	3	2	80	0	1	0	0	5	5	10	6	6	2	1	8	1	25.6612	0.824	0	1	1	2	2	0
512	0	5	3	4	0	0	0	0	0	0	0	1	2	0		0	0	0	0	0	0	0	0	0	3	3	2	92	0	1	0	1	3	4	10	8	2	4	3	8	2	23.939	0.756	1	1	1	2	2	1
513	0	3	2	4	0	0	0	0	1	0	0	0	1	1	2	0	0	0	0	0	0	0	0	0	3	4	2	65	1	0	0	0	1	6	7	5	8	6	5	7	3	30.4498	0.776	1	1	1	1	1	2
514	0	2	4	2	0	0	0	0	0	0	0	1	2	0		0	0	0	0	0	0	0	0	0	3	3	2	91	0	1	0	0	1	2	10	10	1	2	2	10	2	24.0346	1	1	1	1	2	2	1
519	1	5	3	4	0	0	0	1	0	0	0	0		0		0	0	0	0	0	0	0	0	0	3	3	2	75	0	0	0	0	6	5	10	10	10	5	1	10	1	23.8715	0.824	0	1	1	2	2	1
524	0	4	3	2	0	1	0	0	0	0	0	0	2	1	1	1	0	1	0	0	0	0	0	1	3	2	4	61	0	0	0	0	3	5	10	5	5	5	5	5	5	21.9671	0.771	1	1	1	1	1	1
528	0	5	3	4	0	1	0	0	0	0	0	0	2	1	1	1	0	0	0	0	0	0	0	0	3	2	3	50	0	1	0	0	5	8	10	2	3	8	6	9	4	25.9787	0.723	1	1	1	1	1	1
534	0	5	3	2	0	0	0	0	1	0	0	0	3	1	2	0	0	0	0	0	0	0	0	0	3	3	3	70	0	0	0	0	4	5	10	5	8	5	1	10	1	30.4878	0.776	0	1	1	2	2	1
536	0	5	3	1	0	0	0	0	1	0	0	0	1	0		0	0	0	0	0	0	0	0	0	3	3	2	90	0	0	0	0	4	3	10	2	10	3	3	9	3	19.9792	0.824	1	1	1	2	2	2
546	0	2	4	2	0	0	1	0	0	0	0	0		0		0	0	0	0	0	0	0	0	0	3	3	2	75	0	0	0	0	2	3	10	1	4	4	5	3	6	17.5781	0.756	0	1	1	1	1	0
551	1	2	1	2	0	0	0	0	1	0	0	0	2	0		0	0	0	0	0	0	0	0	0	3	3	2	80	0	0	0	1	1	3	10	8	5	3	2	10	1	27.968	1	1	1	1	2	2	2
554	0	3	2	2	0	0	0	0	0	0	0	1		0		0	0	0	0	0	0	0	0	0	3	3	3	72	0	0	0	0	1	3	9	2	5	5	6	6	4	23.1405	0.708	0	1	1	1	1	0
556	1	2	1	3	0	0	0	0	1	0	0	0	3	0		0	0	0	0	0	0	0	0	0	3	3	3	60	0	0	0	0	4	3	6	7	5	5	3	7	3	27.0416	0.824	0	2	1	3	2	1
565	0	2	1	2	0	0	0	0	1	0	0	0		1	1	1	0	0	0	0	0	0	0	0	3	3	2	75	0	0	0	0	5	5	10	8	10	6	2	10	1		0.456	0	1	1	2	2	1
569	1	4	1	4	1	0	0	1	1	0	0	0	2	1	2	0	0	0	0	0	0	0	0	0	3	3	2	85	0	0	0	0	6	3	10	7	10	5	6	9	4	23.1481	0.824	1	1	1	2	2	3
573	1	5	3	4	1	0	0	0	0	0	0	0	2	0		0	0	0	0	0	0	0	0	0	3	3	2	61	0	0	0	0	5	6	10	4	2	6	8	5	5	26.0146	0.756	1	1	1	1	1	1
579	1	2	4	1	0	0	0	1	0	0	0	0	3	0		0	0	0	0	0	0	0	0	0	3	3	2	92	0	0	0	0	6	1	7	5	7	3	2	3	2	26.8122	1	0	1	1	2	2	1
580	1	5	1	2	0	0	0	0	0	0	0	1	3	0		0	0	0	0	0	0	0	0	0	3	3	3	72	1	0	0	0	1	5	6	7	5	5	5	5	1	20.3712	1	0	1	1	1	2	0
602	1	2	1	1	0	0	1	0	0	0	0	0	2	1	2	0	0	0	0	0	0	0	0	0	3	3	2	80	0	0	0	0	5	1	10	10	10	1	1	10	1	25.2595	1	1	1	1	2	2	1
605	1	5	3	4	1	0	0	0	0	0	0	0	1	0		0	0	0	0	0	0	0	0	0	3	3	3	35	0	1	0	1	1	4	10	1	7	4	10	8	1	33.2085	0.627	1	1	1	1	1	1
611	0	3	3	2	1	1	0	0	0	0	0	0	2	0		0	0	0	0	0	0	0	0	0	3	4	3	65	1	0	0	0	5	5	10	3	7	5	4	8	3	26.9896	0.756	1	1	1	1	1	1
615	1	4	3	4	1	0	0	1	0	0	0	0	2	1	1	1	0	0	0	0	0	0	0	0	3	3	4	47	0	0	0	0	6	5	10	6	5	6	3	7	2	33.3137	0.713	1	1	1	1	2	2
2	0	2	4	2	0	0	0	0	0	0	0	1		0		0	0	0	0	0	0	0	0	0	3	3	2	92	0	0	0	0	1	1	1	10	1	1	1	10	1	23.3355	1	0	2	2	3	3	0
7	0	2	1	1	0	0	0	0	0	0	0	1	2	0		0	0	0	0	0	0	0	0	0	3	3	3	75	0	0	0	0	3	3	3	6	7	4	3	7	2	23.2254	1	1	2	2	3	3	1
11	0	2	2	2	0	1	0	0	0	0	0	0	3	1	2	0	0	0	0	0	0	0	0	0	3	3	2	80	0	0	0	0	5	3	5	8	5	3	4	7	3	26.6097	0.824	0	2	2	3	3	0
30	0	2	1	2	0	0	0	0	0	0	0	1		0		0	0	0	0	0	0	0	0	0	3	3	4	30	0	0	0	0	3	3	4	8	6	3	2	3	4	37.2024	0.321	0	2	2	3	3	0
34	0	2	1	1	0	0	0	0	0	0	0	1		0		0	0	0	0	0	0	0	0	0	3	3	2	90	0	0	0	0	4	1	1	10	1	1	1	10	1	25.6544	1	0	2	2	3	3	0
35	0	2	4	1	0	0	0	0	0	0	0	1	2	0		0	0	0	0	0	0	0	0	0	4	3	2	80	0	0	0	0	4	2	6	7	7	3	2	6	1	26.3465	0.824	1	2	2	3	2	1
41	0	2	4	1	0	0	0	0	0	0	0	1	2	0		0	0	0	0	0	0	0	0	0	3	3	1	100	0	0	0	0	5	1	1	9	10	2	1	10	1	19.3772	1	1	2	2	3	3	1
56	0	2	2	1	0	0	0	0	0	0	0	1		0		0	0	0	0	0	0	0	0	0	3	3	2	93	0	0	0	0	5	4	4	7	4	3	3	5	3	23.1084	0.776	0	2	2	3	3	0
65	0	3	3	2	0	0	0	0	0	0	0	1		0		0	0	0	0	0	0	0	0	0	3	3	2	90	0	0	0	0	6	3	6	9	1	4	1	10	1	18.7242	0.824	0	1	2	2	3	0
73	0	2	4	2	0	0	0	0	0	0	0	1		1	2	0	0	0	0	0	0	0	0	0	3	3	2	85	0	1	0	1	4	1	1	9	1	1	1	10	1	25.3086	1	0	2	2	3	3	0
79	0	2	4	3	0	0	1	0	0	0	0	0		1	2	0	0	0	0	0	0	0	0	0	3	3	2	80	0	0	0	0	1	1	6	8	10	4	3	8	2	22.6474	1	0	2	2	3	2	0
88	0	2	1	2	0	0	0	0	0	0	0	1	2	0		0	0	0	0	0	0	0	0	0	3	3	1	90	0	0	0	0	3	1	1	10	2	1	1	10	1	24.8016	1	1	2	2	3	3	1
92	0	3	1	2	0	0	0	0	0	0	0	1	2	1	2	0	0	0	0	0	0	0	0	0	3	3	1	97	0	1	0	1	5	2	8	8	5	1	2	10	1	25.3444	1	1	1	2	2	2	1
99	0	2	2	1	0	0	0	0	0	0	0	1	2	0		0	0	0	0	0	0	0	0	0	3	3	1	95	0	0	0	0	3	2	1	9	5	2	2	10	1	22.7204	0.824	1	2	2	3	3	1
113	0	3	2	1	0	0	0	0	0	0	0	1		0		0	0	0	0	0	0	0	0	0	3	3	3	74	0	0	0	0	3	3	4	7	7	3	4	1	3	22.4813	0.703	0	2	2	3	3	0
133	0	4	4	1	0	0	0	0	0	0	0	1	1	0		0	0	0	0	0	0	0	0	0	3	2	2	95	0	0	0	0	3	1	7	10	10	2	1	10	1	25.2363	0.824	1	1	2	2	2	1
134	0	2	1	1	0	0	0	0	0	0	0	1	2	0		0	0	0	0	0	0	0	0	0	3	3	2	90	0	0	0	0	4	1	1	10	1	1	1	10	1	22.3214	0.824	1	2	2	3	3	1
142	0	2	2	1	0	0	0	1	0	0	0	0	1	0		0	0	0	0	0	0	0	0	0	3	3	1	97	0	0	0	0	3	1	1	10	10	2	1	10	1	24.7676	1	1	2	2	3	3	2
161	0	2	4	1	0	0	0	0	0	0	0	1		0		0	0	0	0	0	0	0	0	0	3	3	2	88	0	0	0	0	4	1	1	10	1	1	1	10	1	26.2985	1	0	2	2	3	3	0
166	0	3	3	3	0	0	0	1	1	0	0	0	1	1	1	1	0	1	0	0	0	0	0	0	3	2	2	49	0	0	0	0	1	3	3	5	9	5	4	8	5	29.0318	0.66	1	1	2	1	3	3
175	0	2	4	1	0	0	0	1	0	0	0	0	1	0		0	0	0	0	0	0	0	0	0	3	3	2	75	0	0	0	1	5	2	1	8	3	2	1	8	1	21.9671	1	1	2	2	3	3	2
184	0	2	4	1	0	0	0	0	0	0	0	1	3	0		0	0	0	0	0	0	0	0	0	3	3	2	90	0	0	1	1	3	1	1	9	5	3	2	10	3	29.0174	1	0	2	2	3	3	0
187	0	2	1	2	0	0	0	1	0	0	0	0		0		0	0	0	0	0	0	0	0	0	3	3	2	80	1	0	0	0	5	1	2	1	5	1	1	10	1	27.1809	1	0	2	2	3	3	1
191	0	3	1	2	0	0	0	0	0	0	0	1	2	0		0	0	0	0	0	0	0	0	0	3	3	2	84	0	0	0	0	4	1	3	7	6	3	3	3	1	26.0617	0.818	1	2	2	3	3	1
205	0	2	1	3	1	0	0	1	0	0	0	0	2	1	2	0	0	0	0	0	0	0	0	0	3	3	1	100	0	0	0	0	4	3	4	8	5	4	5	7	3	21.6333	1	1	2	2	3	3	2
206	0	3	1	2	0	0	0	0	0	0	0	1		0		0	0	0	0	0	0	0	0	0	3	3	2	75	0	0	0	0	5	2	2	3	8	3	2	2	2	22.6562	0.756	0	2	2	3	3	0
220	0	3	1	2	0	0	0	0	0	0	0	1	2	0		0	0	0	0	0	0	0	0	0	3	3	2	60	0	0	0	0	3	3	6	8	8	4	2	8	2	21.7993	0.723	1	2	2	3	2	1
223	0	3	4	2	0	0	0	0	1	0	0	0	2	1	2	0	0	0	0	0	0	0	0	0	3	3	2	90	0	0	0	0	5	2	3	10	10	2	1	10	1	25.3515	1	1	2	2	3	3	2
233	0	2	1	2	0	0	0	0	0	0	0	1	1	0		0	0	0	0	0	0	0	0	0	3	3	3	50	0	1	0	0	4	2	1	10	2	1	10	2	1	30.4367	0.755	1	2	2	3	3	1
237	0	3	2	2	0	0	0	0	0	0	0	1	2	1	2	0	0	0	0	0	0	0	0	0	3	3	1	81	0	0	0	0	4	2	2	9	1	2	2	6	2	24.1588	1	1	2	2	3	3	1
243	0	2	4	1	0	0	0	0	0	0	0	1		0		0	0	0	0	0	0	0	0	0	3	3	3	80	0	0	0	0	5	1	1	9	10	1	1	2	1	26.4463	0.824	0	2	2	3	3	0
247	0	3	2	1	0	0	0	0	0	1	0	0	3	0		0	0	0	0	0	0	0	0	0	3	3	2	86	0	0	0	0	5	1	3	9	10	8	1	9	2	18.2868	0.824	0	2	2	3	3	0
259	1	2	4	1	0	0	0	0	0	0	0	1	1	0		0	0	0	0	0	0	0	0	0	3	3	1	90	0	0	0	0	3	2	1	9	5	2	2	10	1	28.7105	1	1	2	2	3	3	1
277	1	2	4	1	0	0	0	0	0	0	0	1	4	0		0	0	0	0	0	0	0	0	0	3	3	2	78	0	0	0	0	1	2	3	8	8	5	2	3	2	28.4055	0.824	0	2	2	3	3	0
282	1	2	4	1	0	0	0	0	0	0	0	1		0		0	0	0	0	0	0	0	0	0	3	3	2	89	0	0	0	0	5	2	2	8	2	3	2	8	2	26.4721	0.824	0	2	2	3	3	0
283	1	3	2	2	0	0	0	0	0	0	0	1		1	2	0	0	0	0	0	0	0	0	0	3	3	2	75	0	0	0	0	6	1	6	8	6	1	1	10	1	31.1419	1	0	1	2	2	3	0
296	1	2	4	2	0	0	0	0	0	0	0	1		0		0	0	0	0	0	0	0	0	0	3	3	2	85	0	0	0	0	5	1	1	10	1	1	1	1	1	33.9506	1	0	2	2	3	3	0
300	1	2	4	2	0	0	0	0	0	0	0	1	2	0		0	0	0	0	0	0	0	0	0	3	3	3	60	0	0	0	0	3	2	3	9	10	5	2	10	1	23.7812	0.771	1	2	2	3	3	1
307	1	4	4	1	0	0	0	0	0	0	0	1		0		0	0	0	0	0	0	0	0	0	3	3	2	90	0	0	0	0	1	1	1	10	1	1	1	10	1	28.6661	1	0	2	2	3	3	0
311	1	2	4	1	0	0	0	0	0	0	0	1	3	0		0	0	0	0	0	0	0	0	0	3	3	2	88	0	0	0	0	6	1	4	3	4	1	1	3	1	19.2628	1	0	2	2	3	3	0
312	1	2	1	1	0	0	0	0	0	0	0	1	2	0		0	0	0	0	0	0	0	0	0	3	3	1	90	0	0	0	0	6	2	2	10	2	2	1	7	1	25.4848	1	1	2	2	3	3	1
332	1	2	3	1	0	0	0	0	0	0	0	1		0		0	0	0	0	0	0	0	0	0	3	3	3	69	0	0	0	0	6	1	1	8	10	2	1	10	1	33.9084	1	0	2	2	3	3	0
350	1	2	4	1	0	0	0	0	0	0	0	1	2	0		0	0	0	0	0	0	0	0	0	3	3	2	95	0	0	0	0	2	1	1	10	10	3	1	3	1	27.7778	1	1	2	2	3	3	1
385	1	2	4	1	0	0	0	0	0	0	0	1		0		0	0	0	0	0	0	0	0	0	3	3	2	85	0	0	0	0	1	1	1	9	1	1	1	10	5	27.4693	1	0	2	2	3	3	0
392	1	2	1	1	0	0	0	0	0	0	0	1		0		0	0	0	0	0	0	0	0	0	3	3	2	85	0	0	0	0	4	1	1	6	4	3	3	2	3	29.0367	1	0	2	2	3	3	0
394	1	2	2	1	0	0	0	0	0	0	0	1	2	0		0	0	0	0	0	0	0	0	0	4	3	2	74	0	0	0	0	5	2	2	9	9	2	2	8	2	28.982	1	1	2	2	3	3	1
416	1	3	1	1	0	0	0	0	1	0	0	0	1	0		0	0	0	0	0	0	0	0	0	3	3	2	91	0	0	0	0	1	2	2	9	10	2	3	10	3	21.8659	1	1	2	2	3	3	2
430	1	2	4	2	0	0	0	0	0	0	0	1	2	0		0	0	0	0	0	0	0	0	0	3	3	1	100	0	1	0	0	6	1	1	10	1	1	1	10	1	26.5432	1	1	2	2	3	3	1
439	1	2	1	2	0	0	0	0	1	0	0	0	2	0		0	0	0	0	0	0	0	0	0	3	3	2	85	0	1	0	1	3	2	3	8	6	7	6	4	6	21.8573	1	1	1	2	1	1	2
448	1	2	4	1	0	0	0	0	0	0	0	1		0		0	0	0	0	0	0	0	0	0	3	3	1	100	0	0	0	0	3	1	1	10	1	2	1	9	1	24.5156	1	0	2	2	3	3	0
457	1	2	4	2	0	0	0	0	0	0	0	1	3	0		0	0	0	0	0	0	0	0	0	3	3	2	78	0	0	0	0	3	2	1	9	2	2	1	8	1	30.1038	1	0	2	2	3	3	0
459	1	2	4	2	0	0	0	0	0	0	0	1		0		0	0	0	0	0	0	0	0	0	3	3	2	90	0	0	0	1	3	2	1	9	2	2	2	9	1	27.1178	1	0	2	2	3	3	0
460	1	2	2	1	0	0	0	0	0	0	0	1	3	0		0	0	0	0	0	0	0	0	0	3	3	3	83	0	0	0	0	3	3	2	9	3	1	1	10	1	35.2653	0.824	0	2	2	3	3	0
477	1	2	4	2	0	0	0	0	0	0	0	1	4	0		0	0	0	0	0	0	0	0	0	3	3	2	90	0	0	0	0	1	1	1	9	5	2	1	9	1	33.9506	1	0	2	2	3	3	0
488	1	2	1	1	0	0	0	0	0	0	0	1		0		0	0	0	0	0	0	0	0	0	3	3	2	90	0	0	0	0	6	1	1	10	1	1	1	10	1	22.206	1	0	2	2	3	3	0
515	1	2	4	1	0	0	0	0	0	0	0	1	2	0		0	0	0	0	0	0	0	0	0	3	3	1	90	0	0	0	0	4	1	1	10	10	1	1	9	1	25	1	1	2	2	3	3	1
522	0	4	1	1	0	0	0	0	0	0	0	1	3	0		0	0	0	0	0	0	0	0	0	3	3	3	85	0	0	1	0	5	1	1	10	4	4	4	10	2	28.306	0.723	0	2	2	3	3	0
525	0	3	2	2	0	0	0	1	0	0	0	0	2	0		0	0	0	0	0	0	0	0	0	3	3	2	90	0	0	0	0	5	2	3	8	5	3	3	8	2	30.4498	0.824	1	2	2	3	3	2
531	1	2	4	2	0	0	0	0	0	0	0	1		0		0	0	0	0	0	0	0	0	0	3	3	2	85	0	0	0	0	3	2	3	7	4	2	2	8	1	24.0213	1	0	2	2	3	3	0
537	1	4	4	1	1	0	0	1	0	0	0	0	2	1	2	0	0	0	0	0	0	0	0	0	3	3	2	90	0	0	0	0	5	2	2	9	3	3	3	8	1	28.4091	1	1	2	2	3	3	2
563	0	4	4	1	0	0	0	0	0	0	0	1	2	0		0	0	0	0	0	0	0	0	0	3	3	1	91	0	1	0	1	3	1	1	9	9	1	1	9	1	22.6003	1	1	2	2	3	3	1
567	1	2	4	2	0	0	0	0	0	0	0	1		0		0	0	0	0	0	0	0	0	0	3	3	3	66	0	0	0	0	4	1	2	9	2	1	1	7	1	31.7956	1	0	2	2	3	3	0
574	1	2	4	2	0	0	0	0	0	0	0	1		0		0	0	0	0	0	0	0	0	0	3	3	3	90	0	0	0	0	5	1	1	9	2	3	1	10	2	24.8971	1	0	2	2	3	3	0
577	1	2	4	1	0	0	0	0	0	0	0	1	2	0		0	0	0	0	0	0	0	0	0	3	3	2	91	0	0	1	0	3	2	2	10	2	2	2	10	1	25.4017	1	1	2	2	3	3	1
583	1	2	1	1	0	0	0	0	0	0	0	1	1	0		0	0	0	0	0	0	0	0	0	3	3	1	84	0	0	0	0	6	1	2	9	2	2	1	9	1	24.2202	1	1	2	2	3	3	1
607	1	3	4	1	0	0	0	0	0	0	0	1	2	0		0	0	0	0	0	0	0	0	0	3	3	2	83	0	0	0	0	6	2	8	8	1	2	1	8	2	23.5898	0.824	1	1	2	2	2	1
610	1	2	1	1	0	0	0	0	0	0	0	1	2	0		0	0	0	0	0	0	0	0	0	3	3	2	85	0	0	0	0	3	2	3	10	2	1	1	9	1	27.6693	1	1	2	2	3	3	1
[truncated: 8 more columns]
